# Supplementary material
Source: PubMed Central journal article supplement (PMC6439569)
Supplement: jamadermatol-155-90-s001.pdf [file jamadermatol-155-90-s001.pdf]

## Supplementary Online Content

Liang SE, Hoffmann R, Peterson E, Soter NA. Use of dapsone in the treatment of chronic idiopathic and autoimmune urticaria. *JAMA Dermatol*. Published online November 21, 2018. doi:10.1001/jamadermatol.2018.3715

### **eFigure.** Standardized Urticaria History

This supplementary material has been provided by the authors to give readers additional information about their work.

Age: Sex:

Duration of Episodes: 

|  |       |  |        |  |      |
|--|-------|--|--------|--|------|
|  | Years |  | Months |  | Days |
|--|-------|--|--------|--|------|

Frequency of New Lesions: \_\_\_\_\_

Lesional Symptoms:  Pruritus  Burning  Tenderness  Tingling  Warmth  None

Duration of Lesions: 

|  |      |  |       |  |     |
|--|------|--|-------|--|-----|
|  | Days |  | Hours |  | Min |
|--|------|--|-------|--|-----|

Sites: 

|  |             |  |
|--|-------------|--|
|  | Time of Day |  |
|--|-------------|--|

Angioedema:  Yes  No Site: \_\_\_\_\_

Antecedent Precipitating Event:  Infection  Medication  Food  Other  None

Relation to Meals:  Yes  No

Relation to Menses:  Yes  No  Menopausal

Relation to Physical Stimuli:

Acute Trauma  Sustained Pressure  Heat  Cold  Light  
 Water  Exercise  Stress  None

Exacerbation by Aspirin or NSAIDs:  Yes  No

History of autoimmune disorders in patient:

Rheumatoid arthritis  Vitiligo  Dermatomyositis  Other \_\_\_\_\_  
 Pemphigus Vulgaris  Bullous Pemphigoid  Thyroid Disease  None  
 Diabetes Mellitus  Systemic Lupus Erythematosus

History of autoimmune disorders in family:

Rheumatoid arthritis  Vitiligo  Dermatomyositis  Other \_\_\_\_\_  
 Pemphigus Vulgaris  Bullous Pemphigoid  Thyroid Disease  None  
 Diabetes Mellitus  Systemic Lupus Erythematosus

Previous Treatments:

|                            |                  |                    |                       |
|----------------------------|------------------|--------------------|-----------------------|
| Azatadine                  | Cetirizine       | Montelukast        | Colchicine            |
| Chlorpheniramine           | Cimetidine       | Zafirlukast        | Omalizumab            |
| Clemastine                 | Desloratidine    | Zileuton           | Dipyridamole          |
| Cyproheptadine             | Fexofenadine     | Doxepin            | Nifedipine            |
| Dexchlorpheniramine        | Levocetirizine   | Dapsone            | Terbutaline           |
| Diphenhydramine            | Loratidine       | Sulfasalazine      | Cyclophosphamide      |
| Hydroxyzine HCl            | Famotidine       | Levothyroxine      | Cyclosporin           |
| Hydroxyzine Pamoate        | Nizatidine       | Methylprednisolone | Methotrexate          |
| Promethazine               | Ranitidine       | Prednisone         | Mycophenolate mofetil |
| Intravenous immunoglobulin | UVB phototherapy | Stanozolol         | Tacrolimus            |

Associated Features:

|                 |                 |                     |                |
|-----------------|-----------------|---------------------|----------------|
| Fever           | Syncope         | Shortness of breath | Diarrhea       |
| Malaise         | Lump in throat  | Chest tightness     | Abdominal Pain |
| Headache        | Tongue swelling | Arthralgia          | Palpitations   |
| Dizziness       | Hoarseness      | Nausea              | Flushing       |
| Lightheadedness | Wheezing        | Vomiting            |                |

Additional Comments:

Past Medical History:

Medications:

Allergies:

Family History:

Social History:

Review of Systems:

Physical Examination:

Assessment and Plan:
